# Supplementary material
Source: PubMed Central journal article supplement (PMC9735078)
Supplement: 41432_2022_831_MOESM1_ESM.pdf [file 41432_2022_831_MOESM1_ESM.pdf]

### Supplemental File 1. MEDLINE Search History

| Ovid MEDLINE(R) and Epub Ahead of Print, In-Process, In-Data-Review & Other Non-Indexed Citations, Daily and Versions(R) <1946 to June 28, 2021> |                                                                                                   |         |
|--------------------------------------------------------------------------------------------------------------------------------------------------|---------------------------------------------------------------------------------------------------|---------|
|                                                                                                                                                  |                                                                                                   |         |
| 1                                                                                                                                                | exp mental health/                                                                                | 44634   |
| 2                                                                                                                                                | exp mental disorders/                                                                             | 1298619 |
| 3                                                                                                                                                | stress, psychological/                                                                            | 126122  |
| 4                                                                                                                                                | occupational stress/                                                                              | 2451    |
| 5                                                                                                                                                | burnout, psychological/                                                                           | 804     |
| 6                                                                                                                                                | burnout, professional/                                                                            | 13498   |
| 7                                                                                                                                                | ((mental or psychological) adj3 (health or ill* or well-being or wellbeing)).ab,kw,ti.            | 212487  |
| 8                                                                                                                                                | ((mental or psychological or job* or work* or occupational) adj3 (stress* or distress)).ab,kw,ti. | 57530   |
| 9                                                                                                                                                | (burnout or burn-out).ab,kw,ti.                                                                   | 14703   |
| 10                                                                                                                                               | anxiety/ or anxiety disorders/                                                                    | 118392  |
| 11                                                                                                                                               | mood disorders/                                                                                   | 14895   |
| 12                                                                                                                                               | depression/ or depressive disorder/                                                               | 194197  |
| 13                                                                                                                                               | Substance-Related Disorders/                                                                      | 98438   |
| 14                                                                                                                                               | (depression or depressive or suicid*).ab,kw,ti.                                                   | 471841  |
| 15                                                                                                                                               | (anxiety or mood).ab,kw,ti.                                                                       | 272026  |
| 16                                                                                                                                               | addict*.ab,kw,ti.                                                                                 | 69293   |
| 17                                                                                                                                               | ((substance or drug or alcohol) adj1 (misus* or use* or abuse*)).ab,kw,ti.                        | 184772  |
| 18                                                                                                                                               | or/1-17                                                                                           | 1991766 |
| 19                                                                                                                                               | exp Dentists/ or Dental Staff/                                                                    | 21581   |
| 20                                                                                                                                               | dentist*.kw,ti.                                                                                   | 41051   |
| 21                                                                                                                                               | Dental hygienist*.kw,ti.                                                                          | 1466    |
| 22                                                                                                                                               | Dental therapist*.kw,ti.                                                                          | 185     |
| 23                                                                                                                                               | dental technician*.kw,ti.                                                                         | 686     |
| 24                                                                                                                                               | Orthodontic therap*.kw,ti.                                                                        | 460     |
| 25                                                                                                                                               | Dental nurse*.kw,ti.                                                                              | 202     |

|    |                                                                |         |
|----|----------------------------------------------------------------|---------|
| 26 | oral surgeon*.kw,ti.                                           | 225     |
| 27 | periodontist*.kw,ti.                                           | 156     |
| 28 | endodontist*.kw,ti.                                            | 154     |
| 29 | orthodontist*.kw,ti.                                           | 870     |
| 30 | dental team.kw,ti.                                             | 243     |
| 31 | (dental adj3 staff).kw,ti.                                     | 158     |
| 32 | (dental adj3 professional*).kw,ti.                             | 802     |
| 33 | dental practitioner*.kw,ti.                                    | 1336    |
| 34 | dental assistant*.kw,ti.                                       | 1039    |
| 35 | (dental adj3 (trainee or training)).kw,ti.                     | 629     |
| 36 | (dental adj3 (speciality or specialist)).kw,ti.                | 91      |
| 37 | (dental adj3 (student* or graduate* or undergraduate*)).kw,ti. | 4477    |
| 38 | or/19-37                                                       | 64372   |
| 39 | 18 and 38                                                      | 2768    |
| 40 | (congress or editorial or letter).pt.                          | 1777509 |
| 41 | 39 not 40                                                      | 2666    |

**Supplemental File 2. List of excluded studies**

| Citation                                                                                                                                                                                                                                                                                                                         | Reason                                           |
|----------------------------------------------------------------------------------------------------------------------------------------------------------------------------------------------------------------------------------------------------------------------------------------------------------------------------------|--------------------------------------------------|
| (2019). "ADA, Alliance of ADA promoting ways to banish burnout <a href="https://www.ada.org/en/publications/ada-news/2019-archive/may/ada-promoting-ways-to-banish-burnout">https://www.ada.org/en/publications/ada-news/2019-archive/may/ada-promoting-ways-to-banish-burnout</a> American Dental Association News 50(10): 1-8. | No outcome data available                        |
| Aboalshamat, K., et al. (2015). "The impact of a self-development coaching programme on medical and dental students' psychological health and academic performance: a randomised controlled trial." BMC medical education 15: 134.                                                                                               | Dental outcome data are not presented separately |
| Baesso Cavalca, A. M., et al. (2019). "The effect of acupuncture on exam anxiety in medical students: a randomized crossover study." Revista Internacional de Acupuntura 13(2): 43-48.                                                                                                                                           | Not Very High Human Development Country (Brazil) |
| Braun, S. E., et al. (2019). "Brief Yoga Intervention for Dental and Dental Hygiene Students: A Feasibility and Acceptability Study." Journal of evidence-based integrative medicine 24: 2515690X19855303.                                                                                                                       | Measures state mindfulness                       |
| Braun, S. E., et al. (2019). "Brief Yoga Intervention for Dental and Dental Hygiene Students: A Feasibility and Acceptability Study." Journal of evidence-based integrative medicine 24: 2515690X19855303.                                                                                                                       | No full text available                           |
| Brondani, M. A., et al. (2014). "Tackling stress management, addiction, and suicide prevention in a predoctoral dental curriculum." Journal of dental education 78(9): 1286-1293.                                                                                                                                                | No outcome data available                        |
| Brooks, S. K., et al. (2013). "Doctors and dentists with mental ill health and addictions: Outcomes of treatment from the Practitioner Health Programme." Journal of Mental Health 22(3): 237-245.                                                                                                                               | Dental outcome data are not presented separately |
| Burk DT, Bender DJ. "Use and perceived effectiveness of student support services in a first-year dental student population." Journal of Dental Education 2005 Oct;69(10):1148-1160.                                                                                                                                              | Non validated outcome measures                   |
| Colley, J. M., et al. (2018). "Teaching stress management in undergraduate dental education: are we doing enough?" British Dental Journal 224(6): 405-407.                                                                                                                                                                       | Opinion piece, no outcome data                   |
| Dilbone, D. A., et al. (2018). "Influence of Preparatory Workshops on Dental Students' Academic Performance and Stress on Their First Operative Dentistry Psychomotor Exam." Journal of dental education 82(6): 608-613.                                                                                                         | Non validated outcome measures                   |
| Howard C. E, et al. (1986) "A comparison of methods for reducing stress among dental students". Journal of Dental Education. 50(9):542-544.                                                                                                                                                                                      | No full text available                           |
| Jackson E, Mealiea WL Jr. (1977) "Stress management and personal satisfaction in dental practice". Dental Clinics of North America. 1977 Jul;21(3):559-576                                                                                                                                                                       | No full text available                           |
| Karpenko, A. E., et al. (2020). "Virtual online learning communities reducing dental student stress and anxiety." Journal of dental education.                                                                                                                                                                                   | Non validated outcome measures                   |
| Kinser, P., et al. (2016). "Awareness is the first step: An interprofessional course on mindfulness & mindfulness movement for healthcare professionals and students." Complementary Therapies in Clinical Practice                                                                                                              | Dental outcome data are not presented separately |
| Lopez, N., et al. (2010). "Does peer mentoring work? Dental students assess its benefits as an adaptive coping strategy." Journal of dental education 74(11): 1197-1205.                                                                                                                                                         | Non validated outcome measures                   |
| Moss, S. B. and N. W. Gaughf (2006). "Dentist impairment: risk factors, signs, prevention, and treatment." Texas dental journal 123(4): 350-355.                                                                                                                                                                                 | No full text available                           |

|                                                                                                                                                                                                                                |                                                 |
|--------------------------------------------------------------------------------------------------------------------------------------------------------------------------------------------------------------------------------|-------------------------------------------------|
| Schroeder DG. (1980)“The effects of group study skills counseling and applied relaxation on study behaviors and test anxiety in medical and dental students”. Annu Conf Res Med Educ. (19):175-80.                             | No full text available                          |
| Schwartz RM, Eigenbrode CR, Cantor O. “A comprehensive stress-reduction program for dental students.” Journal of Dental Education. 1984 Apr;48(4):203-237.                                                                     | No full text is available                       |
| Shankarapillai R, Nair MA, George R. (2012) “The effect of yoga in stress reduction for dental students performing their first periodontal surgery: A randomized controlled study.” International Journal of Yoga. 5(1):48-51. | Not Very High Human Development Country (India) |
| Singh, M., et al. (2020). "Mindful awareness for female dental students through yoga, motivational video, and a combination of two on stress reduction." Journal of family medicine and primary care 9(4): 2028-2032.          | Not Very High Human Development Country (India) |
| Tisdelle DA, et al. (1984) “Stress management training for dental students.” J Dent Educ. 48(4):196-202.                                                                                                                       | No full text available                          |
| Walden, K. (2019). "A Conversation About Well Being: Treating the Impaired Dentist." Journal of the Indiana Dental Association 98(3): 26-28.                                                                                   | No full text available                          |

**Supplemental File 3. Table of study characteristics**

| <b>Author (Date)</b>                              | <b>Aboalshamat et al. (2020)</b>                                              | <b>Adams (2017)</b>           | <b>Chapman, et al. (2017)</b>                                                                                                                 | <b>Gonzalez &amp; Quezada (2016)</b> | <b>Gorter et al. (2001)<br/>Brake et al. (2001)</b>                                                                                | <b>Metz et al. (2020)</b>      | <b>Newton et al. (2006)</b>   | <b>Piazza-Waggoner et al. (2003)</b> |
|---------------------------------------------------|-------------------------------------------------------------------------------|-------------------------------|-----------------------------------------------------------------------------------------------------------------------------------------------|--------------------------------------|------------------------------------------------------------------------------------------------------------------------------------|--------------------------------|-------------------------------|--------------------------------------|
| <b>Country/City</b>                               | Saudi Arabia                                                                  | US (Iowa)                     | UK (England)                                                                                                                                  | Chile                                | Netherlands                                                                                                                        | USA (Louisville)               | UK (England)                  | USA (West Virginia)                  |
| <b>Study Type</b>                                 | Quasi-experimental, two groups                                                | Quasi-experimental, one group | Quasi-experimental, two groups                                                                                                                | Quasi-experimental, one group        | Quasi-experimental, three groups                                                                                                   | Quasi-experimental, one group  | Quasi-experimental, one group | Quasi-experimental, two groups       |
| <b>N of participants/<br/>professional groups</b> | 88 dental students<br><br>44 in coaching programme<br><br>44 in control group | 55 dental students            | 40 primary care dentists<br><br>20 participants for the guided self-help CBT programme<br><br>20 participants for the self-help CBT programme | 5 dental students                    | 92 primary care dentists previously identified at high risk for burnout<br><br>19 in intervention group<br><br>73 in control group | 103 first year dental students | 20 primary care dentists      | 26 second year dental students       |

|                                               |                                                                       |                                           |                                                                                                                                                                                                                                                                                                                                                                                                                                                                                                                                                                      |                            |                            |                                                                                   |                            |                                                                                                                                                                                                                     |
|-----------------------------------------------|-----------------------------------------------------------------------|-------------------------------------------|----------------------------------------------------------------------------------------------------------------------------------------------------------------------------------------------------------------------------------------------------------------------------------------------------------------------------------------------------------------------------------------------------------------------------------------------------------------------------------------------------------------------------------------------------------------------|----------------------------|----------------------------|-----------------------------------------------------------------------------------|----------------------------|---------------------------------------------------------------------------------------------------------------------------------------------------------------------------------------------------------------------|
| <p><b>Characteristics of participants</b></p> | <p>M=0, F=88<br/>mean age<br/>21.84 (SD:1.50)<br/>Age range 19-24</p> | <p>M=18, F=37<br/>Age Range<br/>21-55</p> | <p><b>Guided self help</b></p> <p><b>CBT</b><br/>M=6, F=11<br/>GDS=15,<br/>CDS=0,<br/>Armed Forces=2<br/>Principal=4,<br/>Associate=10,<br/>DF1=1,<br/>Salaried=2<br/>Qualified:<br/>1998.71 (SD<br/>12.61) (Range<br/>1976-2012)<br/>Practising Years:<br/>20.82(SD<br/>11.06)(1-37)</p> <p><b>Self-help CBT</b><br/>M=6, F=12<br/>GDS=15,<br/>CDS=2,<br/>Armed Forces=1<br/>Principal=3,<br/>Associate=7,<br/>DF1=5,<br/>Salaried=3<br/>Qualified:<br/>1990.88 (SD<br/>10.23) (Range<br/>1975-2012)<br/>Practising Years:<br/>13.44(SD<br/>12.09)(Range: 1-38)</p> | <p>No details provided</p> | <p>No details provided</p> | <p>M=48, F=55<br/>Age groups:<br/>≤21( 6%),<br/>22-25 (72%),<br/>&gt;25 (22%)</p> | <p>No details provided</p> | <p><b>Anxiety Management group:</b></p> <p><b>Relaxation training</b><br/>(N=13)<br/>M=6, F=7<br/>Mean age:27 years</p> <p><b>The control Educational group (N = 13)</b><br/>M=8, F=5<br/>Mean age = 26.1 years</p> |
|-----------------------------------------------|-----------------------------------------------------------------------|-------------------------------------------|----------------------------------------------------------------------------------------------------------------------------------------------------------------------------------------------------------------------------------------------------------------------------------------------------------------------------------------------------------------------------------------------------------------------------------------------------------------------------------------------------------------------------------------------------------------------|----------------------------|----------------------------|-----------------------------------------------------------------------------------|----------------------------|---------------------------------------------------------------------------------------------------------------------------------------------------------------------------------------------------------------------|

|                                                    |                                                                                                                                                              |                                                                                                                           |                                                                                                                     |                                                                                                        |                                              |                                                  |                                                                                                                           |                                                           |
|----------------------------------------------------|--------------------------------------------------------------------------------------------------------------------------------------------------------------|---------------------------------------------------------------------------------------------------------------------------|---------------------------------------------------------------------------------------------------------------------|--------------------------------------------------------------------------------------------------------|----------------------------------------------|--------------------------------------------------|---------------------------------------------------------------------------------------------------------------------------|-----------------------------------------------------------|
| <b>Instrument/tool used to measure MHWB issues</b> | Depression and Anxiety Stress Scale ( <b>DASS-21</b> )<br><br>Resilience scale ( <b>RS-14</b> )<br><br>Psychological Well-Being Scale–Short ( <b>PWB-S</b> ) | Counselling Centre Assessment of Psychological Symptoms-34 ( <b>CCAPS-34</b> )<br><br>Outcome Rating Scale ( <b>ORS</b> ) | The Maslach Burnout Inventory ( <b>MBI</b> )<br><br>Dentists Anxieties in Clinical Situation Scale ( <b>DACSS</b> ) | Outcome Questionnaire ( <b>OQ-45.2</b> )<br><br>Dental Environment Stress questionnaire ( <b>DES</b> ) | The Maslach Burnout Inventory ( <b>MBI</b> ) | Clance Impostor Phenomenon Scale ( <b>CIPS</b> ) | Clinical Outcomes in Routine Evaluation ( <b>CORE</b> )<br><br>General Health Questionnaire.<br>The Work Stress Inventory | Spielberger State-Trait Anxiety Inventory ( <b>STAI</b> ) |
|----------------------------------------------------|--------------------------------------------------------------------------------------------------------------------------------------------------------------|---------------------------------------------------------------------------------------------------------------------------|---------------------------------------------------------------------------------------------------------------------|--------------------------------------------------------------------------------------------------------|----------------------------------------------|--------------------------------------------------|---------------------------------------------------------------------------------------------------------------------------|-----------------------------------------------------------|

|                                     |                                                                                                                                                                                                                                 |                                                                                                                                                                                                                                                                                                                                                                                                                                                                                                                      |                                                                                          |                                                                                                                                                                                                                     |                                                                             |                                                                                                                                                                                                                                                                                                                                                                                                                                      |                                                                                                                                                                                                                                                                                                                                                                                                                                                                                |                                                                                                                                                                                                                                                                                                                   |
|-------------------------------------|---------------------------------------------------------------------------------------------------------------------------------------------------------------------------------------------------------------------------------|----------------------------------------------------------------------------------------------------------------------------------------------------------------------------------------------------------------------------------------------------------------------------------------------------------------------------------------------------------------------------------------------------------------------------------------------------------------------------------------------------------------------|------------------------------------------------------------------------------------------|---------------------------------------------------------------------------------------------------------------------------------------------------------------------------------------------------------------------|-----------------------------------------------------------------------------|--------------------------------------------------------------------------------------------------------------------------------------------------------------------------------------------------------------------------------------------------------------------------------------------------------------------------------------------------------------------------------------------------------------------------------------|--------------------------------------------------------------------------------------------------------------------------------------------------------------------------------------------------------------------------------------------------------------------------------------------------------------------------------------------------------------------------------------------------------------------------------------------------------------------------------|-------------------------------------------------------------------------------------------------------------------------------------------------------------------------------------------------------------------------------------------------------------------------------------------------------------------|
| <p><b>Type of interventions</b></p> | <p><b>A life coaching programme.</b></p> <p>Five one-on-one weekly standardised 15-minute phone coaching sessions delivered by five senior dental students who had received intensive coaching training by an expert coach.</p> | <p><b>Individual Intervention:</b><br/>In-house counselling office embedded within the school to provide psychological services to dental students</p> <p><b>Group Intervention:</b><br/>outreach health promotion programmes designed to increase student knowledge, awareness, and self-efficacy regarding psychological stress management practices that promote personal and professional growth and development<br/>Attendance was voluntary with no limit on the number of programs students could attend.</p> | <p>Self Help CBT<br/><b>Bibliotherapy</b><br/>CPD Programme<br/>+ 3h Guided workshop</p> | <p><b>Counselling.</b></p> <p>The theory of the treatment was based on the cognitive-behavioural paradigm, taking as the basis stress training by inoculation and the general guidelines for anxiety treatment.</p> | <p>Intensive individual<br/><b>Counselling</b><br/>and 3 group sessions</p> | <p><b>Impostor Video</b>—The video elaborated on the impostor cycle and identified 6 specific coping mechanisms for impostor thoughts.</p> <p><b>Reminder Cards</b>—At the conclusion of the video, students were provided with small, double-sided reminder cards. One side of the card contained a custom-designed graphic of the impostor cycle, while the other side contained reminders of the 6 proposed coping mechanisms</p> | <p><b>Counselling</b> (up to 6 one-hour sessions) provided by the Kent Dental Practitioners Support Service (DPSS). – Interventions were tailored to meet the individual needs of general dental practitioners within the framework of the six hours and they were not standardised. The techniques adopted by the consultants were various including counselling and therapeutic approaches, teaching and role play, and the identification of information and resources.</p> | <p><b>60-minute training</b> session on how to use specific relaxation strategies (i.e., deep breathing, progressive muscle relaxation) to manage stress and anxiety. Participants also received a cassette tape that contained step-by-step directions for deep breathing and progressive muscle relaxation.</p> |
|-------------------------------------|---------------------------------------------------------------------------------------------------------------------------------------------------------------------------------------------------------------------------------|----------------------------------------------------------------------------------------------------------------------------------------------------------------------------------------------------------------------------------------------------------------------------------------------------------------------------------------------------------------------------------------------------------------------------------------------------------------------------------------------------------------------|------------------------------------------------------------------------------------------|---------------------------------------------------------------------------------------------------------------------------------------------------------------------------------------------------------------------|-----------------------------------------------------------------------------|--------------------------------------------------------------------------------------------------------------------------------------------------------------------------------------------------------------------------------------------------------------------------------------------------------------------------------------------------------------------------------------------------------------------------------------|--------------------------------------------------------------------------------------------------------------------------------------------------------------------------------------------------------------------------------------------------------------------------------------------------------------------------------------------------------------------------------------------------------------------------------------------------------------------------------|-------------------------------------------------------------------------------------------------------------------------------------------------------------------------------------------------------------------------------------------------------------------------------------------------------------------|



|                   |                                                                                              |                                         |                                           |                                         |                                                                                                                                               |                                         |                                         |                                                                                                                                                                                                             |
|-------------------|----------------------------------------------------------------------------------------------|-----------------------------------------|-------------------------------------------|-----------------------------------------|-----------------------------------------------------------------------------------------------------------------------------------------------|-----------------------------------------|-----------------------------------------|-------------------------------------------------------------------------------------------------------------------------------------------------------------------------------------------------------------|
| <b>Comparator</b> | The participants in the control group received no coaching or intervention during this time. | Participants acted as their own control | Self-help CBT Bibliotherapy CPD Programme | Participants acted as their own control | Participants received no counselling. However, some of the control group participants acted upon their self-initiative to reduce their stress | Participants acted as their own control | Participants acted as their own control | Lecture on the relation among stress, anxiety, and health. Participants in this group received cassette tapes containing ocean wave sounds, but no further instructions about how or when to use the tapes. |
|-------------------|----------------------------------------------------------------------------------------------|-----------------------------------------|-------------------------------------------|-----------------------------------------|-----------------------------------------------------------------------------------------------------------------------------------------------|-----------------------------------------|-----------------------------------------|-------------------------------------------------------------------------------------------------------------------------------------------------------------------------------------------------------------|

|                                       |                                                                                                                                                                                                                     |                                                                                                                        |                                                                                                                                                                                                                                                                                                                                                                                                                                                                                                                                     |                                                                                                                                                                                                                                                       |                                                                                                                                                                                                                                                                                                                                                 |                                                                                                                                                                                                                                                                                                                                                                                                                                                                                                                                   |                                                                                                                                                                                                                                                                                                                                                                                                                                                                                                                                                                                 |                                                                                               |
|---------------------------------------|---------------------------------------------------------------------------------------------------------------------------------------------------------------------------------------------------------------------|------------------------------------------------------------------------------------------------------------------------|-------------------------------------------------------------------------------------------------------------------------------------------------------------------------------------------------------------------------------------------------------------------------------------------------------------------------------------------------------------------------------------------------------------------------------------------------------------------------------------------------------------------------------------|-------------------------------------------------------------------------------------------------------------------------------------------------------------------------------------------------------------------------------------------------------|-------------------------------------------------------------------------------------------------------------------------------------------------------------------------------------------------------------------------------------------------------------------------------------------------------------------------------------------------|-----------------------------------------------------------------------------------------------------------------------------------------------------------------------------------------------------------------------------------------------------------------------------------------------------------------------------------------------------------------------------------------------------------------------------------------------------------------------------------------------------------------------------------|---------------------------------------------------------------------------------------------------------------------------------------------------------------------------------------------------------------------------------------------------------------------------------------------------------------------------------------------------------------------------------------------------------------------------------------------------------------------------------------------------------------------------------------------------------------------------------|-----------------------------------------------------------------------------------------------|
| <p><b>Effect of interventions</b></p> | <p>The results showed that there were significant differences in the depression, stress, self-acceptance, and goal approach measurements. Conversely, the other measurements showed no significant differences.</p> | <p>A positive relationship was found between number of counselling appointments and increased overall functioning.</p> | <p>DASS(Depression) was significantly reduced at 6 weeks with the reduction maintained at 6 months.</p> <p>At 6 weeks there was a clinically and statistically significant reduction in depression, anxiety and stress levels (DASS-21), a statistically significant reduction in burnout (emotional exhaustion) and hypervigilant decision-making, and an increase in personal achievement.</p> <p>The improvements in depression, stress, emotional exhaustion and hypervigilant decision-making were maintained at 6 months.</p> | <p>After attending 8 sessions, all 5 participants reduced their perceived stress in the dental environment. Two of the 5 participants initially had dysfunctional scores according to the questionnaire OQ-45.2 and by the end had normal scores.</p> | <p>Participants in the psychological intervention showed decreased burn-out scores (MBI) at the end of the intervention.</p> <p>In a year's follow up participants in the intervention group demonstrated relapse in their burn-out scores, however those who had spontaneously acted to reduce their stress showed sustained improvements.</p> | <p>There was a statistically significant decrease in impostor thoughts following the coping skills intervention from <math>63.44 \pm 14.92</math> to <math>59.12 \pm 14.56</math> (<math>P &lt; 0.05</math>); an improvement of <math>4.32 \pm 9.85</math>. the percentage of students exhibiting intense impostor experiences decreased from 13.6% to 4.9%. Additionally, a greater percentage of students had few impostor characteristics, from 5.8% at the beginning of the semester to 10.7% at the end of the semester.</p> | <p>General Health Questionnaire (General distress)- Mean(SD) Pre 14.8 (5.4) - Post 9.38 (3.29), <math>Z=-2.18</math>, <math>P=0.003</math></p> <p>Clinical Outcomes in Research &amp; Evaluation Total Score Mean(SD) Pre 1.00(0.45)- Post 0.79(0.47), <math>Z=-0.85</math>, <math>P=0.40</math></p> <p>The Work Stress Inventory, Mean(SD) Pre 99.94 (22.92)- Post 90.67 (19.22), <math>Z=-1.24</math>, <math>P=0.21</math></p> <p>Respondents' views of treatment using the Treatment Evaluation Inventory Total (Score Range 19-95)- Scored 73.9 (11.75)</p> <p>Progress</p> | <p>No significant differences were found between groups on any of the ratings of anxiety.</p> |
|---------------------------------------|---------------------------------------------------------------------------------------------------------------------------------------------------------------------------------------------------------------------|------------------------------------------------------------------------------------------------------------------------|-------------------------------------------------------------------------------------------------------------------------------------------------------------------------------------------------------------------------------------------------------------------------------------------------------------------------------------------------------------------------------------------------------------------------------------------------------------------------------------------------------------------------------------|-------------------------------------------------------------------------------------------------------------------------------------------------------------------------------------------------------------------------------------------------------|-------------------------------------------------------------------------------------------------------------------------------------------------------------------------------------------------------------------------------------------------------------------------------------------------------------------------------------------------|-----------------------------------------------------------------------------------------------------------------------------------------------------------------------------------------------------------------------------------------------------------------------------------------------------------------------------------------------------------------------------------------------------------------------------------------------------------------------------------------------------------------------------------|---------------------------------------------------------------------------------------------------------------------------------------------------------------------------------------------------------------------------------------------------------------------------------------------------------------------------------------------------------------------------------------------------------------------------------------------------------------------------------------------------------------------------------------------------------------------------------|-----------------------------------------------------------------------------------------------|

|  |  |  |  |  |  |  |                                                                                                                                 |  |
|--|--|--|--|--|--|--|---------------------------------------------------------------------------------------------------------------------------------|--|
|  |  |  |  |  |  |  | <p>(Score Range<br/>11-55), Scored<br/>38.08(8.72)</p> <p>Acceptability<br/>(Score Range<br/>8-40), Scored<br/>35.85 (4.56)</p> |  |
|--|--|--|--|--|--|--|---------------------------------------------------------------------------------------------------------------------------------|--|
